# 1 **COVID\_19's lost puzzle piece: the power of domestic animal reservoir**

2 Nazli Saeedi<sup>1</sup>, Seyed Abbas Rafat<sup>2\*</sup>

3 1 Research Center for Pharmaceutical Nanotechnology, Biomedicine Institute, Tabriz

4 University of Medical Sciences, Tabriz, Iran Email : [saeedi@hotmail.fr](mailto:saeedi@hotmail.fr), 2 Department of

5 Animal Science, Faculty of Agriculture, University of Tabriz, Tabriz, Iran, Email;

6 [abbasrafat@hotmail.com](mailto:abbasrafat@hotmail.com) \*Corresponding Author

## 7 **Abstract**

8 In recent months, despite being aware of the COVID-19 pandemic, many countries faced  
9 increasing epidemic of this disease. Nearly all countries tried to decrease human-to-human  
10 contact as the principal mode of transmission of SARS-CoV-2. Other modes of transmission also  
11 need to be clarified in more depth, especially, the foodborne transmission. We assessed the effect  
12 of animal origin foods consumption on the pandemic of COVID-19. For this purpose, we studied  
13 the relationship among 20 food supply as independent variables, and the parameter of Total  
14 Cases dependent variable. Here we show a relationship between a group of animal origin food  
15 and total cases. Stepwise Regression, Bayes, and Lasso results showed that eggs and fresh fish  
16 have positive coefficient. So, among the transmission ways of COVID\_19, the role of foodborne  
17 transmission should be more significant than previously thought. The possibility of Animal  
18 Origin Foodborne Transmission should be taken into more consideration. There is need to invent  
19 a pasteurization-like-processes to implicate immediately before ingestion of food. Of course,  
20 there will be challenges along the way of the revolution in the food preparation culture. The  
21 perspective is to expand the surveillance of SARS-Cov-2 during the food production chain.

## 22 **Author summary**

23 At the time of writing this manuscript, the number of TC of COVID-19 past seven-million mark.  
24 During the pandemic, most countries around the world minimized human-to-human contact and  
25 travels. However, the prevalence of COVID-19 continued. Despite the awareness of many  
26 countries about the principal mode of person-to-person transmission, the rapid outbreak shows  
27 the necessity of research on other transmission routes. We suppose the role of FBT of COVID-19  
28 should be more significant than previously thought. The effect of a group of animal origin foods  
29 including eggs and fresh fish on total cases was significant in our analysis. At present, we are not  
30 able to interpret all significant effects and their coefficients. Interpretation of the factors could be  
31 the subject of future researches. In food science technology, it is necessary to expand the  
32 detection of viruses to all animal origin foods. WHO's recommendations state that COVID\_19  
33 have not FBT, and suitable food safety practices could prevent the probability of FBT. However,  
34 the realization of proper food safety practices for all foods is questionable.

## 35 **Introduction**

36 At the time of writing this manuscript, the number of TC of COVID-19 past seven-million mark.  
37 During the pandemic, most countries around the world minimized human-to-human contact and  
38 travels[1]. However, the prevalence of COVID-19 continued. Despite the awareness of many  
39 countries about the principal mode of person-to-person transmission, the rapid outbreak shows  
40 the necessity of research on other transmission routes. In Italy and the USA, for example, the  
41 chances of being surprised were low, but both countries faced epidemic dramatically. Among the  
42 various routes of transmission, FBT is most likely. We suppose the role of FBT of COVID-19  
43 should be more significant than previously thought. Transmission of MERS, a similar pathogenic  
44 virus to SARS-Cov-2, through food has strengthened our hypothesis.

45 Furthermore, some researchers cited the possibility of FBT for SARS-Cov-2 [2][3–6] . Also,  
46 FAO/WHO experts mentioned the data gap in the relationship between viruses and FB disease  
47 [7] . The motivation for the present study is to find the relationship between COVID\_19 and  
48 human food consumption patterns.

## 49 **Finding the relevance of TC with food**

50  
51 Material and methods are included in supplementary materials.

52 We assessed a relationship between the consumption of some foods and TC. Accordingly, we  
53 studied TC as a dependent variable and 20 food supply data as independent variables. The  
54 statistical methods included correlation, stepwise and LASSO regression, Principal Component  
55 Analysis (PCA), and Bayes analysis. Food supply (kg/capita/yr.) was quantity in each country.  
56 The primary purpose of the study was to find effect of AOF on TC, however, we considered six  
57 plant origin foods for comparison. Histogram of the variables, and their logarithmic  
58 transformation are presented in Figs S1 and S2. Diagnostics panels and selection criteria of  
59 regression models are presented in Figs S3-S5. The scree plot of PCA is shown in Fig S6. Visual  
60 examination of the trace plot in Bayesian analysis is shown in Fig S8. Adjusted R-square and  
61 Geweke diagnostics of fitted models are presented in S1 and S2 Tables, respectively.

62 Furthermore, the relationship between TC and animal production in each country was estimated  
63 using the same statistical methods.

## 64 **Results and Discussion**

### 65 **Food consumption**

66

67 Table 1 shows descriptive statistics of studied variables. Results of PCA show that AOF and TC  
68 are mostly grouped (Fig 1 and S7 Fig). The highest positive Pearson correlation with TC belongs  
69 to eggs. Stepwise Regression, Bayes, and Lasso results showed that eggs and fresh fish have  
70 positive coefficient. With our results in Table 2, implying the need for tracing of SARS-COV-2  
71 in some AOF. Bayes results, e.g., show there is a 0.99 probability of a positive correlation  
72 between eggs and TC, adjusted for the other covariates. The number of AOF and their role in our  
73 results varies depending on the type of statistical method used, but all results are consistent.

74

75

76

77

78

79

80

81

82

83

84

85

86

87 **Table 1. Descriptive statistics of studied foods (n=20) besides total cases.**

| #  | Variable (kg/capita/yr)          | Abbreviation | N   | Mean     | Std Dev   | Minimum | Maximum |
|----|----------------------------------|--------------|-----|----------|-----------|---------|---------|
| 1  | <b>Pig meat</b>                  | pig          | 169 | 14.66    | 15.52     | 0.00    | 71.48   |
| 2  | <b>Bovine Meat</b>               | bov          | 174 | 11.20    | 9.00      | 0.78    | 55.48   |
| 3  | <b>Cheese</b>                    | che          | 173 | 4.97     | 6.55      | 0.00    | 30.82   |
| 4  | <b>Cream</b>                     | cre          | 159 | 1.21     | 2.76      | 0.00    | 18.45   |
| 5  | <b>Eggs</b>                      | Egg          | 174 | 7.08     | 5.09      | 0.16    | 19.15   |
| 6  | <b>Fresh water Fish</b>          | freshf       | 174 | 3.38     | 4.54      | 0.00    | 34.00   |
| 7  | <b>Honey</b>                     | hon          | 168 | 0.36     | 0.46      | 0.00    | 3.51    |
| 8  | <b>Milk, Whole</b>               | milk         | 174 | 59.17    | 48.93     | 0.96    | 258.44  |
| 9  | <b>Poultry Meat</b>              | poul         | 174 | 20.56    | 16.46     | 0.42    | 72.87   |
| 10 | <b>Demersal Fish</b>             | demer        | 173 | 3.40     | 4.93      | 0.00    | 33.45   |
| 11 | <b>Cephalopods</b>               | ceph         | 171 | 0.44     | 0.96      | 0.00    | 6.70    |
| 12 | <b>Butter, Ghee</b>              | butg         | 174 | 1.25     | 1.64      | 0.00    | 9.25    |
| 13 | <b>Marine Fish, Other</b>        | marf         | 172 | 2.74     | 4.87      | 0.00    | 28.19   |
| 14 | <b>Aquatic Plants</b>            | aqp          | 162 | 0.20     | 1.91      | 0.00    | 22.41   |
| 15 | <b>Beverages, Alcoholic</b>      | bev          | 171 | 3.20     | 3.87      | 0.00    | 26.90   |
| 16 | <b>Rice(Milled Equivalent)</b>   | rice         | 174 | 30.95    | 36.20     | 0.95    | 171.73  |
| 17 | <b>Potatoes and products</b>     | potato       | 174 | 34.89    | 33.65     | 0.05    | 183.16  |
| 18 | <b>Maize and products</b>        | maiz         | 170 | 21.71    | 28.52     | 0.00    | 158.40  |
| 19 | <b>Wheat and products</b>        | wheat        | 174 | 70.92    | 46.85     | 1.89    | 222.40  |
| 20 | <b>wine</b>                      | wine         | 169 | 6.27     | 9.49      | 0.00    | 51.41   |
|    | <b>Total Cases (Per Country)</b> | TC           | 215 | 29247.33 | 138459.41 | 1       | 1837578 |

88

89

90

91 **Table 2. The results of Pearson correlation and multivariate analyses.** All variables are  
 92 logarithmic transformed data. For abbreviations, see Table 1.

|               | <b>r, P Value, n</b> | <b>Stepwise</b> | <b>lasso</b> | <b>Bayes</b> |
|---------------|----------------------|-----------------|--------------|--------------|
| <b>pig</b>    | 0.17, 0.03, 156      | -0.52           | -0.28        | 0.19         |
| <b>bov</b>    | 0.26, 0.008, 161     |                 |              | 0.63         |
| <b>Che</b>    | 0.28, 0.0004, 161    |                 |              | 0.29         |
| <b>cre</b>    | 0.18, 0.03, 150      |                 |              | 0.47         |
| <b>egg</b>    | 0.43, <.0001, 161    | 1.84            | <b>1.16</b>  | <b>0.99</b>  |
| <b>freshf</b> | 0.31, <.0001, 161    | 1               | <b>0.90</b>  | <b>0.99</b>  |
| <b>hon</b>    | 0.23, 0.004, 158     |                 |              | 0.20         |
| <b>milk</b>   | 0.21, 0.006, 161     |                 |              | 0.48         |
| <b>poul</b>   | ns                   |                 |              | 0.31         |
| <b>demer</b>  | 0.25, <.0001, 160    |                 | 0.22         | 0.79         |
| <b>ceph</b>   | ns                   |                 |              | 0.51         |
| <b>Butg</b>   | 0.34, <.0001, 161    |                 | 0.08         | 0.80         |
| <b>marf</b>   | -0.45, <.0001, 159   | -1.36           | -1.29        | -1.00        |
| <b>aqp</b>    | ns                   |                 |              | 0.50         |
| <b>bev</b>    | ns                   |                 |              | 0.16         |
| <b>rice</b>   | ns                   |                 | 0.30         | 0.98         |
| <b>potato</b> | 0.36, <.0001, 161    |                 | 0.22         | 0.88         |
| <b>maiz</b>   | ns                   |                 | 0.13         | 0.92         |
| <b>wheat</b>  | 0.29, 0.0002, 161    |                 | 0.32         | 0.90         |
| <b>wine</b>   | 0.19, 0.02, 157      |                 |              | 0.75         |

93

94

95 The effect of a group of AOF on TC was significant in our analysis. So, we suppose a noticeable  
96 effect of AOF in FBT. At present, we are not able to interpret all significant effects and their  
97 coefficients. Interpretation of the factors could be the subject of future researches. Potential  
98 transmission ways of COVID-19 based on the results of our analysis and bibliography is  
99 summarized as Fig 2. The transmission of coronaviruses through food has been reported[6]. Lake  
100 and Kingsbury (2020) provided a review about potential for FBT of COVID-19, but they could  
101 not guarantee the application of the data found on other coronaviruses to SARS-CoV-2[6]. The  
102 persistence of viruses by refrigeration temperature[7] might be an explanation of the relationship  
103 between COVID-19 and AOF. The viral persistence of coronavirus in soft cheese [8] and raw  
104 milk[9] has been reported. We don't know what's going on from “Farm to Fork” about AOF. For  
105 example, SARS-CoV-2 may be more resistant to heat when cooking, as it is observed for  
106 poliovirus in beef[10]. It is recommended not to consume raw or undercooked animal  
107 products[11]. Kitchen utensils can transmit the virus among foods[12], accordingly, AOF may be  
108 a suitable vehicle, and the virus inside them will survive better and longer. The human  
109 pathogenic virus, such as Enterovirus, can survive in honey, so it is imaginable similarly for  
110 SARS-CoV-2. Honey bees deposit viruses on flowers[13]. Maori showed horizontal RNA flow  
111 among honey bees by the ingestion of royal jelly[14]. Trade in raw honey bee products could  
112 pose pandemic risks for pathogen viruses of honey bees[15]<sup>17</sup>. The pessimist hypothesis would  
113 be the transmission of SARS-CoV-2 by raw honey.

114 Furthermore, the methods of diagnosing the virus in food are not complete, and there are many  
115 limitations[16]<sup>18</sup>. In food science technology, the primary attention paid to bivalve molluscs.  
116 Nowadays, it is necessary to expand the detection of viruses to all AOF.

117 WHO's recommendations state that COVID\_19 have not FBT, and suitable food safety practices  
118 could prevent the probability of FBT. However, the realization of proper food safety practices for  
119 all AOF is questionable.

## 120 **Animal production**

121  
122 The highest pair-wise Pearson correlations between the number of livestock and TC belong to  
123 poultry (0.71), turkeys (0.68), pigs (0.62), horses (0.59), a[1]nd beehives (0.57) with P-value of  
124 ( $<0.0001$ ) for all of them. The chosen variables in Bayesian analysis were the number of chicken,  
125 turkeys, pigs, and goats, and in Lasso analysis they were the number of chickens, pigs, and  
126 turkeys. The observed positive correlation between the number of beehives and TC should be  
127 explained by circulating viruses between animal and human. As, some zoonotic viruses first  
128 circulate in animals, and sometimes they infect humans. After that, they adapt to humans. A  
129 recent zoonotic transmission event of SARS-CoV-2 is reported[17]. It is crucial to characterize  
130 circulating viruses in the human working environment, especially where an interface with  
131 wildlife[18]. Spread of influenza virus during commercial movement of eggs is reported by  
132 Pillai[19]. Poultry production in the extensive system increases the chance of SARS-CoV-2  
133 transmission among other species[20]. Feathers detached from domestic ducks reported as a  
134 source of environmental contamination to pathogenic avian influenza virus[21]. Qui et al.  
135 identified pigs, cows, goats, and sheep among the most likely intermediate animal hosts for  
136 SARS-CoV-2 [22]. The outbreak of COVID-19 highlights viral spillover from animals[23].  
137 There is the potential for the emergence of new coronavirus diseases in domestic birds, from  
138 both avian and mammalian sources. For example, a novel species of coronaviridae family has  
139 been identified recently[24]. *Coronaviridae's* family viruses are likely can cross the species  
140 barrier of viruses and infect other species, fishes, cattle, pigs, and humans[25].



141 **Conclusion**

142  
143 Despite the awareness and readiness of many countries for COVID-19 during early 2020, why  
144 did it spread so quickly? It seems FBT has received less attention relative to other routes. There  
145 is need to invent a pasteurization-like-processes to implicate immediately before ingestion of  
146 food. Of course, there will be challenges along the way of the revolution in the food preparation  
147 culture. The perspective is to expand the surveillance of SARS-Cov-2 during the food production  
148 chain.

149 **Fig. 1 PCA results: the interrelationships between all variables.** Some of AOF are closer to  
150 TC. For abbreviations, see Table 1.

151 **Fig. 2 Potential transmission ways of COVID-19 based on the results of our analysis and**  
152 **bibliography.** It is necessary to study the exchange of human pathogen viruses in wildlife and  
153 livestock. Where and how suspicious foods become contaminated must be investigated. The  
154 potential spillover of pathogenic viruses from arthropods hosts to humans should be  
155 investigated[23]. The cross-species transmission is reported[26].There may be a type of contact  
156 among flowers, bees, and bats. Infected humans could also have transmitted MERS to the camels  
157 [27]. SARS-CoV-2 and MERS-Co are among the most notable examples of spillover into  
158 humans[28]. References for arrows:

159 1: [11][14,18,26,29,30]

160 2: [11,26]

161 3: [24,26]

162 4: [31,32]

163 5: [5,8,33][34]

164 6 [4,34]

165

## 166 **Material and Methods**

### 167 **Food consumption**

168 We estimated the relationship between 20 food supply and Total Cases of covid19.

169 The methods include pair-wise correlation with Proc Corr, Stepwise Regression

170 with Proc Reg, LASSO regression with GLMSELECT Proc, Principal Component

171 Analysis with Proc Princomp, and Bayes analysis with Proc Genmod (SAS). Food

172 supply was quantity (kg/capita/yr.). Fourteen foods of animal origin and six foods

173 of plant origin were selected. The primary purpose of the study was to find animal

174 origin foods relationship with TC, but some plant origin foods were chosen to

175 compare.

176 We started our analyses first time on March 2020. Then we repeated it several

177 times with updated COVID\_19 data on April, May, and June. Finally we presented

178 the results of June' data.

### 179 **Data**

180 COVID\_19 <https://www.worldometers.info/coronavirus/> 1 June 2020

181 Live Animal production data: <http://www.fao.org/faostat/en/#data/QA>

182 Food Supply - Crops Primary Equivalent:

183 <http://www.fao.org/faostat/en/#data/CC>

184 Food Supply - Livestock and Fish Primary Equivalent:

185 <http://www.fao.org/faostat/en/#data/CL>

186 We used base- $e$  logs, also known as natural logs (LOG in SAS) for the  
187 transformation of TC and independent variables. In all analyses, the accuracy of  
188 the model with non-transformed data was very low. So, all variables has been  
189 transformed to normalize the distributions. With transformation of data, the  
190 accuracy of the model increased to an acceptable level. In PCA, as a nonparametric  
191 method, we utilized non-transformed data, in which the variables are treated  
192 equally, i.e., that is, there are no dependent variables.

193 In comparison of models, Lasso's results are more reliable than stepwise regression  
194 and Bayes, because it's AIC was smaller and had higher accuracy as R-square (S1  
195 Table).

196

197

198

199

200 **S1 Table. Adjusted R-square and AIC of fitted models for food consumption.**

|                     | <b>Stepwise</b> | <b>LASSO</b> | <b>BAYES</b> |
|---------------------|-----------------|--------------|--------------|
| <b>R-Square</b>     | 0.48            | 0.52         | -            |
| <b>Adj-R_Square</b> | 0.47            | 0.48         | -            |
| <b>AIC</b>          | -               | 301          | 551          |
| <b>n</b>            | 131             | 131          | 131          |

201

202 Bayesian Analysis: Visual examination of the trace plot displays proper mixing,

203 for one independent variable in presented in S8 Fig. The P-value in the Geweke

204 Diagnostics (S2 Table) showed that the mean estimate of the Markov chain is

205 stable over time. The positive probability that B1 greater than 0 is estimated.

206

207

208

209

210

211

212

213 **S2 Table Geweke diagnostics from Genmode analysis. Pr > z shows**

214 convergence for all variables. For abbreviations, see Table 1

| Parameter * | z       | Pr >  z |
|-------------|---------|---------|
| Intercept   | 0.2734  | 0.7845  |
| pig         | 0.6475  | 0.5173  |
| bov         | -0.2165 | 0.8286  |
| che         | -0.7437 | 0.4571  |
| cre         | -0.9484 | 0.3429  |
| egg         | -1.5173 | 0.1292  |
| freshf      | 0.4354  | 0.6633  |
| hon         | 0.7984  | 0.4246  |
| milk        | -0.0434 | 0.9654  |
| poul        | 0.9524  | 0.3409  |
| demer       | -0.9509 | 0.3416  |
| ceph        | 0.7935  | 0.4275  |
| butg        | 1.898   | 0.0577  |
| marf        | -0.4608 | 0.6449  |
| aqp         | 0.58    | 0.5619  |
| bev         | -1.1802 | 0.2379  |
| rice        | -0.9809 | 0.3266  |
| potato      | -1.0137 | 0.3107  |
| maiz        | -0.3024 | 0.7624  |
| wheat       | 0.5066  | 0.6124  |
| wine        | -0.0076 | 0.994   |
| Scale       | 0.0274  | 0.9781  |

215 \* Logarithmic transformation for all parameters

216 Although the probability of transmitting the virus through wine is zero, we  
217 deliberately kept it in the initial model of our analysis. Results showed wine is  
218 eliminated among significant variables of the suited model (Table 2). So we  
219 concluded that just the energy content of food should not keep a variable in the  
220 fitted model. So, in addition to energy content, there must be something else in  
221 food-related COVID-19. The high-fat tissue in the body affects on the  
222 pathogenesis of COVID-19[35]. We concentrate FB transmission of COVID-19  
223 rather than the immunity response.

#### 224 **Animal and crop production**

225 We utilized the GLMSLECT procedure of SAS 9.2 with the method of least  
226 absolute shrinkage and selector operator (LASSO). The dependent variable was  
227 TC, and independent variables were beehives, cattle, chicken, pigs, goats, turkeys,  
228 horse, rabbit, maize, barley, and apples. Maize, Barley, apples were deliberately  
229 kept in a multi-variable model, to test whether plant material production remains in  
230 the model compared to livestock production. We used the GENMOD procedure of  
231 the SAS using the *BAYES* statement to obtain *Bayesian* analysis. Spearman and  
232 Pearson correlation between stocks and TC calculated. Analyzes were performed  
233 with log-transformed data. Due to the higher accuracy of the transformed data,  
234 their results were used.

235 There are references[36] that guide us to construct our hypothesis about the  
236 essential relationship between COVID-19 and AOF include.

237 We provide the SAS code for an application of the used statistical methods [37].

238 We note that this work was posted as preprint on medrxiv[38] .

#### 239 **ACKNOWLEDGEMENTS:**

240 **Author contributions:** Conceptualization and Visualisation: N. S. K., Methodology: S. A. R.

241 Writing: Both authors.

242 The authors have declared no competing interest.

243 Data and materials availability: All data are available in the manuscript or the supplementary  
244 materials.

#### 245 **Supporting information**

246

247 **S1 Fig. Histogram of variables of Total cases before (left) and after (right)**  
248 **logarithmic transformation.**

249 **S2 Fig. Histogram of some independent variables before and after logarithmic**  
250 **transformation.** First row, from Left to right: cream, log cream, pigs, logpigs.

251 Second row: Bovine meat, log bovin meat, eggs, log of eggs.

252 **S3 Fig. Diagnostics panel.** Fit diagnostics and residual by regressors, in  
253 multivariate regression with stepwise selection of variables.

254 **S4 Fig. Other Criteria Suggest Stopping the Selection (GLMSELECT proc of**  
255 **SAS).** Progression of squared errors (left) and Fit criteria of LASSO analysis.

256 **S5 Fig. Results of the GLMSELECT Proc of SAS.** The standardized coefficients  
257 of all the effects that are selected at some step of the elastic net method, plotted as  
258 a function of the step number of LASSO analysis.

259 **S6 Fig. Scree plot and percentage of variance explained by principal**  
260 **componentsofPCA analysis.**

261 **S7 Fig. Results of PROC PRINCOMP, includes 1 by 3 (left)and 2 by 3(right)**  
262 **component pattern plots.** Principal component analysis results showed that AOF  
263 are generally closer to TC in the comparison with other studied foods.

264 **S8 Fig. Bayesian Analysis:** Visual examination of the trace plot displays proper  
265 mixing for Eggs.

266

## 267 **References**

- 268 1. Merler S, Pastore A, Mu K, Rossi L, Sun K. The effect of travel restrictions on the spread  
269 of the 2019 novel coronavirus (COVID-19) outbreak. 2020;400: 395–400.
- 270 2. Panel E, Biohaz H. Scientific Opinion on an update on the present knowledge on the  
271 occurrence and control of foodborne viruses 1. 2011;9: 1–96.  
272 doi:10.2903/j.efsa.2011.2190.



- 273 3. Todd ECD, Greig JD, Todd E, Llc C. Viruses of foodborne origin: a review. 2020; 25–  
274 46.
- 275 4. Hi ZS. REVIEW ARTICLE A brief review of foodborne zoonoses in China. 2020; 1497–  
276 1504. doi:10.1017/S0950268811000872
- 277 5. Newell DG, Koopmans M, Verhoef L, Duizer E, Aidara-kane A, Sprong H, et al.  
278 International Journal of Food Microbiology Food-borne diseases — The challenges of 20  
279 years ago still persist while new ones continue to emerge. International Journal of Food  
280 Microbiology. 2010;139: S3–S15. doi:10.1016/j.ijfoodmicro.2010.01.021
- 281 6. Kingsbury J, Lake R, Hewitt J, Smit E, King N. POTENTIAL FOR FOODBORNE  
282 TRANSMISSION OF COVID-19: 2020; 1–51.
- 283 7. FAO/WHO. [Food and Agriculture Organization of the United Nations/World Health  
284 Organization]. Microbiological Risk Assessment Series. 2008;14: 151.
- 285 8. Panon G, Tache S, Labie C. Respective stability of rotavirus and coronavirus in bovine  
286 milk. 1988;68: 49–64.
- 287 9. Rota DOF, Viruses C, Raw IN. Benha veterinary medical journal. 2013; 79–85.
- 288 10. Pirtle EC. Virus survival in the environment. 1991;10: 733–748.
- 289 11. Moy GG. IUFoST / CIFST hold an Extraordinary Scientific Roundtable on COVID-19  
290 and Food Safety. npj Science of Food. 2020; 1–2. doi:10.1038/s41538-020-0068-2
- 291 12. Sarah C. P. Williams. Kitchen Utensils Transfer Viruses. Available:  
292 <https://www.sciencemag.org/news/2012/12/kitchen-utensils-transfer-viruses>
- 293 13. Id SAA, Burnham PA, Boncristiani HF, Brody K. RNA virus spillover from managed

- 294 honeybees ( *Apis mellifera* ) to wild bumblebees ( *Bombus* spp .). 2019; 1–13.
- 295 14. Maori E, Trust W, Reports C. Discovery of RNA transfer through royal jelly could aid  
296 development of honey bee vaccines. 2019; 3–5. doi:10.1016/j.celrep.2019.04.073
- 297 15. Mutinelli F. The spread of pathogens through trade in honey bees and their products (   
298 including queen bees and semen ): overview and recent developments Honey bees.  
299 2011;30: 257–271.
- 300 16. Bosch A, Gkogka E, Le FS, Loisy-hamon F, Lee A, Lieshout L Van, et al. International  
301 Journal of Food Microbiology Foodborne viruses□: Detection , risk assessment , and  
302 control options in food processing. International Journal of Food Microbiology. 2018;285:  
303 110–128. doi:10.1016/j.ijfoodmicro.2018.06.001
- 304 17. Kujawski, S.A., Wong, K.K., Collins, J.P. et al. Clinical and virologic characteristics of  
305 the first 12 patients with coronavirus disease 2019 (COVID-19) in the United States. Nat  
306 Med 26, 861–868 (2020). <https://doi.org/10.1038/s41591-020-0877-5>Title.
- 307 18. Bourgarel M, Pfukenyi D, Becquart P, Morand S. Next-Generation Sequencing on  
308 Insectivorous Bat Guano□: An Accurate Tool to Identify Arthropod Viruses of Potential  
309 Agricultural Concern. 2019. doi:10.3390/v11121102
- 310 19. Pillai SPS, Saif ABYM, Leeabc CW. Detection of Influenza A Viruses in Eggs Laid by  
311 Infected Turkeys Author ( s ): S . P . S . Pillai , Y . M . Saif and C . W . Lee Published  
312 by□: American Association of Avian Pathologists Stable URL□:  
313 <https://www.jstor.org/stable/40801707> REFERENCES Linked references are available on  
314 JSTOR for this article□: You may need to log in to JSTOR to access the linked references  
315 . Detection of Influenza A Viruses in Eggs Laid by Infected Turkeys. 2020;54: 830–833.

- 316 20. Cavanagh D, Cavanagh D. Coronaviruses in poultry and other birds Coronaviruses in  
317 poultry and other birds. 2007;9457. doi:10.1080/03079450500367682
- 318 21. Yamamoto Y, Nakamura K, Yamada M, Mase M. Persistence of Avian Influenza Virus (   
319 H5N1 ) in Feathers Detached from Bodies of Infected Domestic Ducks □. 2010;76: 5496–  
320 5499. doi:10.1128/AEM.00563-10
- 321 22. Qiu Y, Zhao Y, Wang Q, Li J, Zhou Z, Liao C, et al. Predicting the angiotensin converting  
322 enzyme 2 ( ACE2 ) utilizing capability as the receptor of SARS-CoV-2. Microbes and  
323 Infection. 2020;2. doi:10.1016/j.micinf.2020.03.003
- 324 23. Tao Z, Tian J, Pei Y, Yuan M, Zhang Y, Dai F. A new coronavirus associated with human  
325 respiratory disease in China. 2020;579. doi:10.1038/s41586-020-2008-3
- 326 24. Papineau A, Berhane Y, Wylie TN, Wylie KM, Sharpe S, Lung O. Genome Organization  
327 of Canada Goose Coronavirus , A Novel Species Identified in a Mass Die-off of Canada  
328 Geese. Scientific Reports. 2019; 1–8. doi:10.1038/s41598-019-42355-y
- 329 25. Viruses F, Leong JC, Advisor SS, Services S. Fish Viruses. 2020; 227–234.  
330 doi:10.1016/B978-012374410-4.00400-3
- 331 26. Miller RS, Sweeney SJ, Sloomaker C, Grear DA, Salvo PA Di, Kiser D, et al. Cross-  
332 species transmission potential between wild pigs , livestock , poultry , wildlife , and  
333 humans□: implications for disease risk management in North America. Scientific Reports.  
334 2017; 1–14. doi:10.1038/s41598-017-07336-z
- 335 27. Kai Kupferschmidt. New Middle Eastern Virus Found in Camels. 2013. Available:  
336 <https://www.sciencemag.org/news/2013/11/new-middle-eastern-virus-found-camels>

- 337 28. Guan Y, Zheng BJ, He YQ, Liu XL, Zhuang ZX, Cheung CL, et al. Isolation and  
338 characterization of viruses related to the SARS coronavirus from animals in southern  
339 China. *Science* (New York, NY). 2003;302: 276–278. doi:10.1126/science.1087139
- 340 29. Rizzo F, Edenborough KM, Toffoli R, Culasso P, Zoppi S, Dondo A, et al. Coronavirus  
341 and paramyxovirus in bats from Northwest Italy. 2017; 1–11. doi:10.1186/s12917-017-  
342 1307-x
- 343 30. McMahon DP, Wilfert L, Paxton R, Brown M, Holloway R. Emerging Viruses in Bees:  $\square$ :  
344 From. 2018. doi:10.1016/bs.aivir.2018.02.008
- 345 31. Waldron DF, Morris CA, Baker RL, Johnson DL. Maternal effects for growth traits in  
346 beef cattle. *Livestock Production Science*. 1993;34: 57–70.  
347 doi:[https://doi.org/10.1016/0301-6226\(93\)90035-G](https://doi.org/10.1016/0301-6226(93)90035-G)
- 348 32. Geisbert TW, Mire CE, Geisbert JB, Chan Y, Agans KN, Feldmann F, et al. Therapeutic  
349 Treatment of Nipah Virus Infection in Nonhuman Primates with a Neutralizing Human  
350 Monoclonal Antibody. 2014;6.
- 351 33. McKusick BC, Thomas DL, Berger YM. Effect of Weaning System on Commercial Milk  
352 Production and Lamb Growth of East Friesian Dairy Sheep. *Journal of Dairy Science*.  
353 2001;84: 1660–1668. doi:10.3168/JDS.S0022-0302(01)74601-2
- 354 34. Gibbins JD, Hale C, Silver M, Fischer M, Steinberg J, Basler CA, et al. COVID-19  
355 Among Workers in Meat and Poultry Processing Facilities —. 2020;69: 557–561.
- 356 35. Maffetone PB, Laursen PB. The Perfect Storm  $\square$ : Coronavirus ( Covid-19 ) Pandemic  
357 Meets Overfat Pandemic. 2020;8: 1–6. doi:10.3389/fpubh.2020.00135

- 358 36. Katy Askew. 2020 German slaughterhouses under fire over “insufficient precautionary  
359 measures” to block COVID-19 spread. 2020.
- 360 37. Rafat SA. DATA of Preprint: Human food consumption patterns concerning COVID-19  
361 pandemic. 2020. doi:10.13140/RG.2.2.30851.12321
- 362 38. Rafat, S.A. saeedi N. Human food consumption patterns concerning COVID-19  
363 pandemic. Available: <https://www.medrxiv.org/content/10.1101/2020.06.16.20132464v1>
- 364
- 365
- 366

Fig1

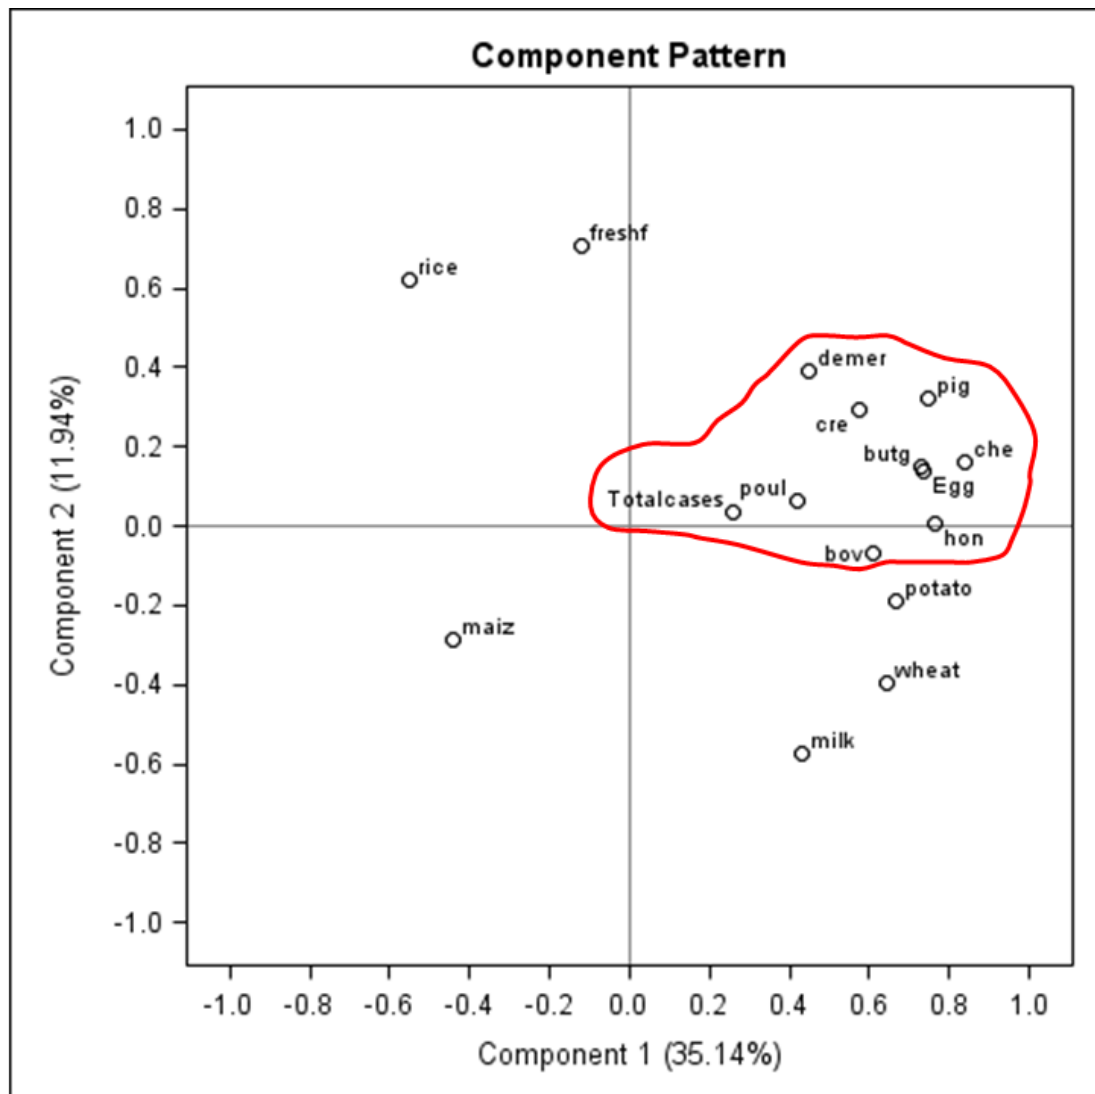

Fig 2

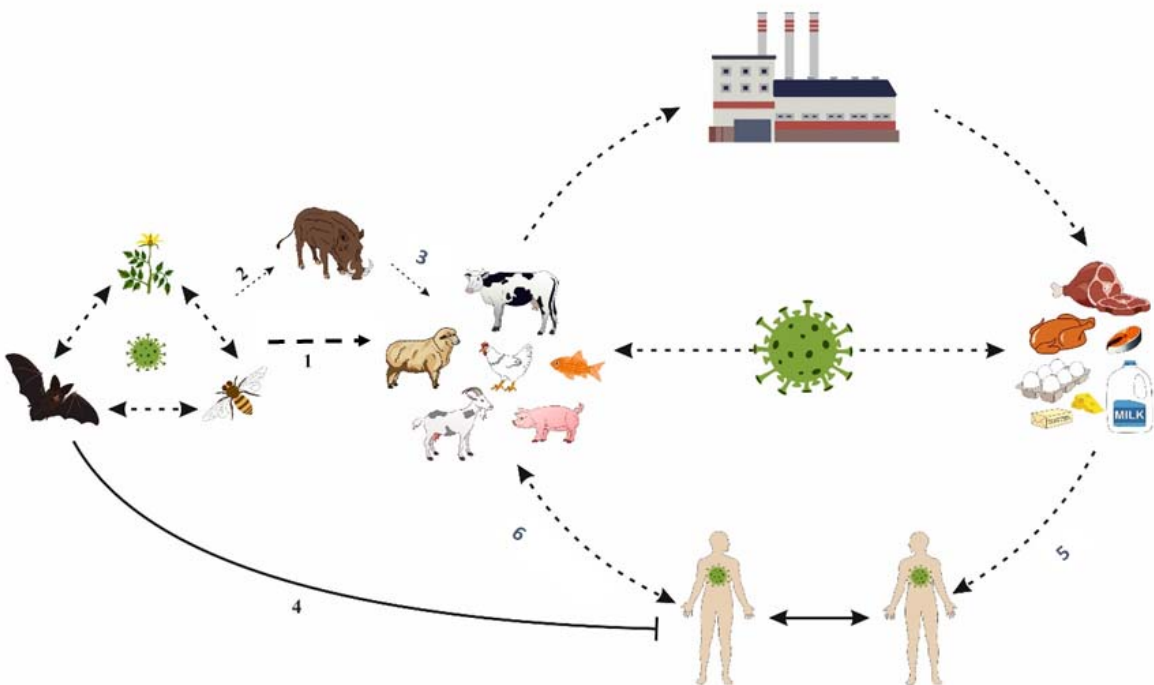

Fig s1

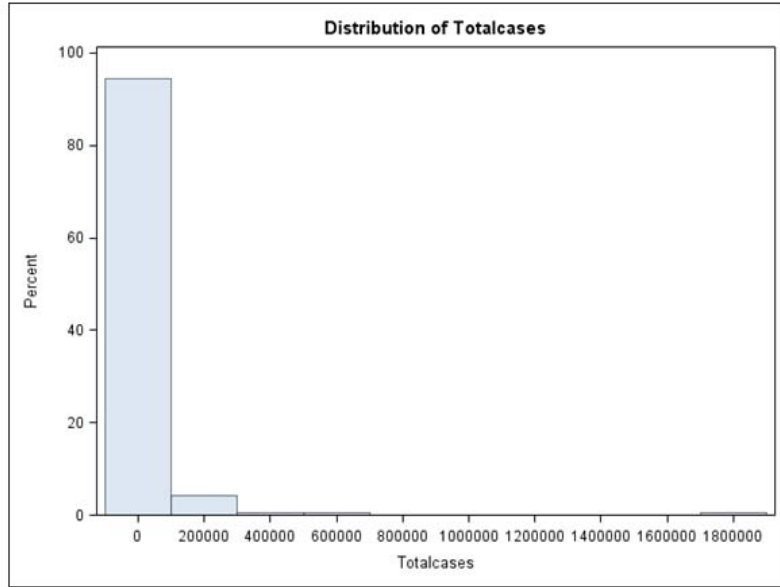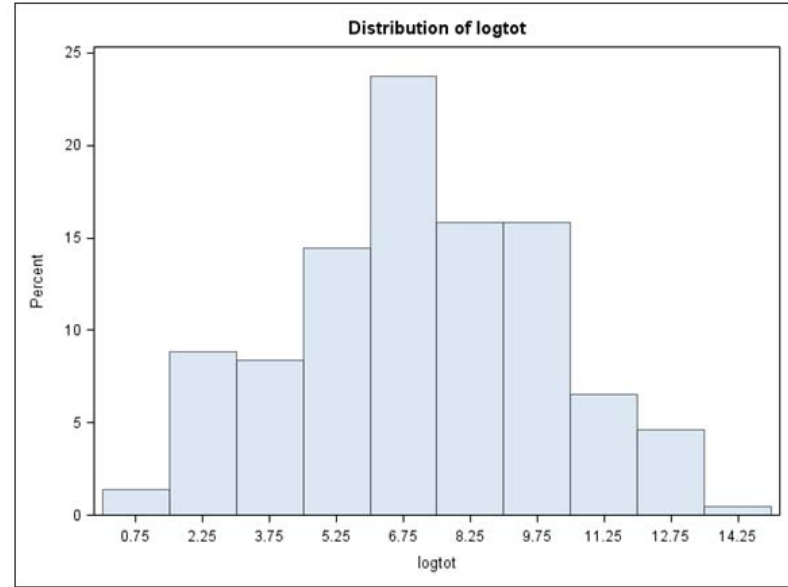



Fig s2

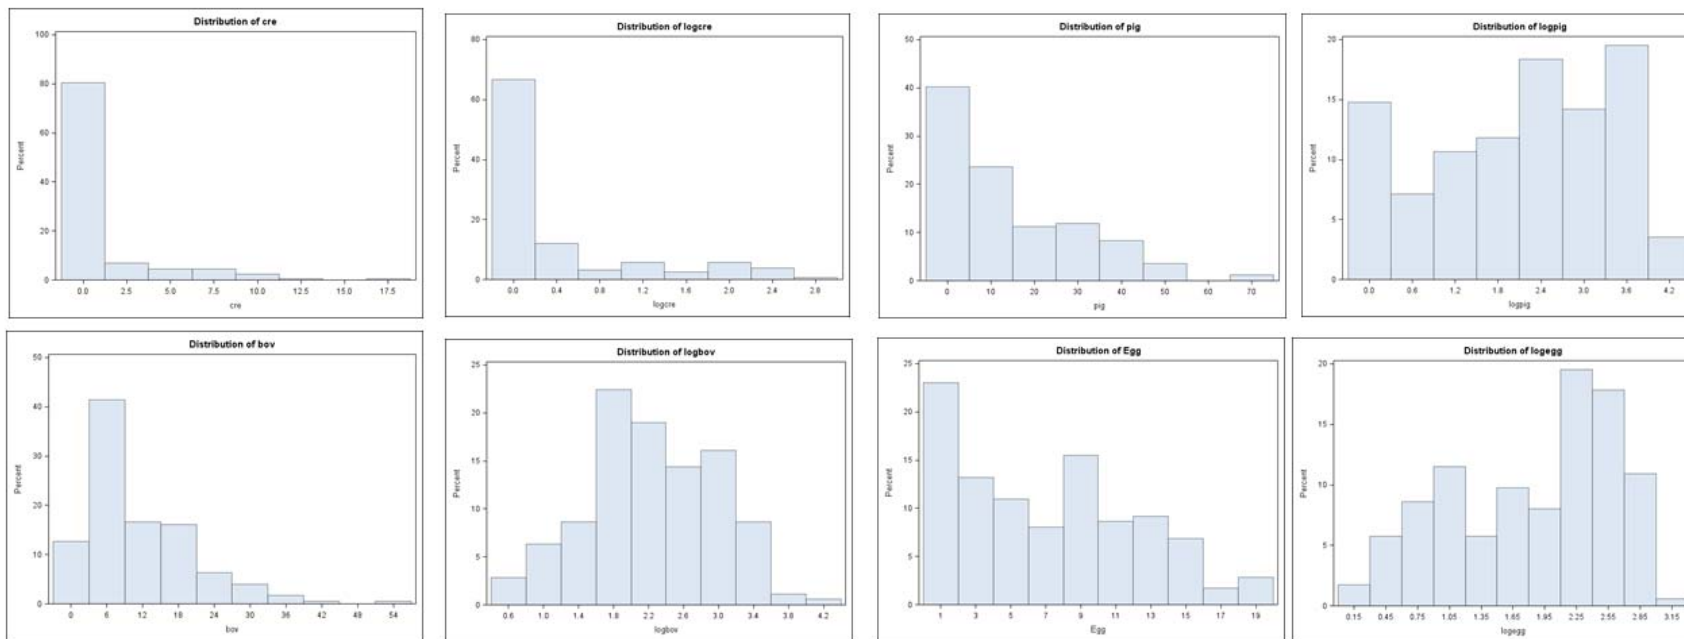

Fig s3

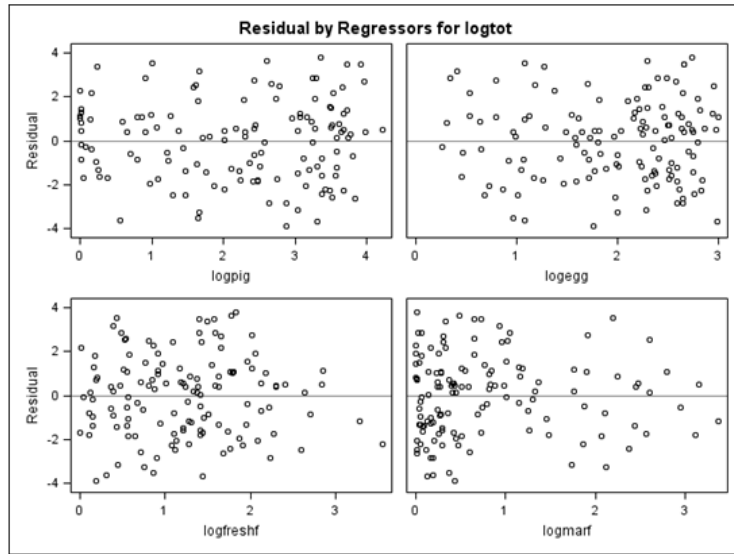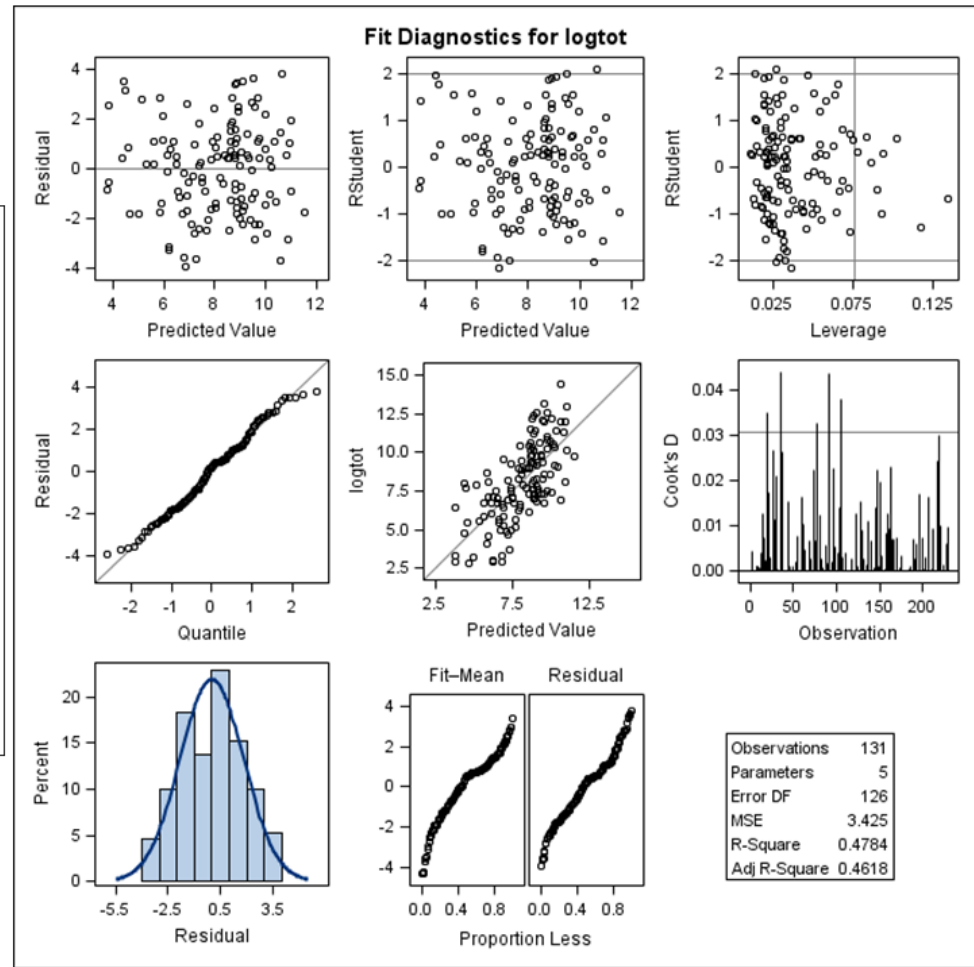

Fig s4

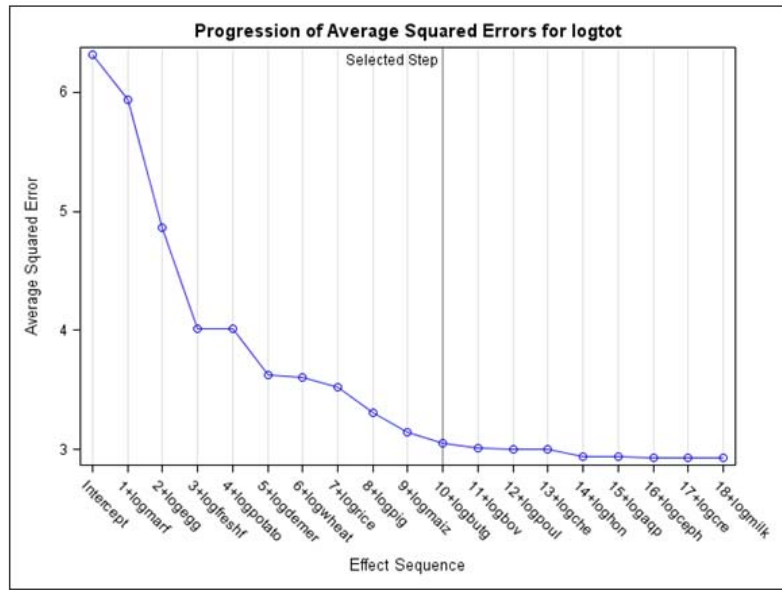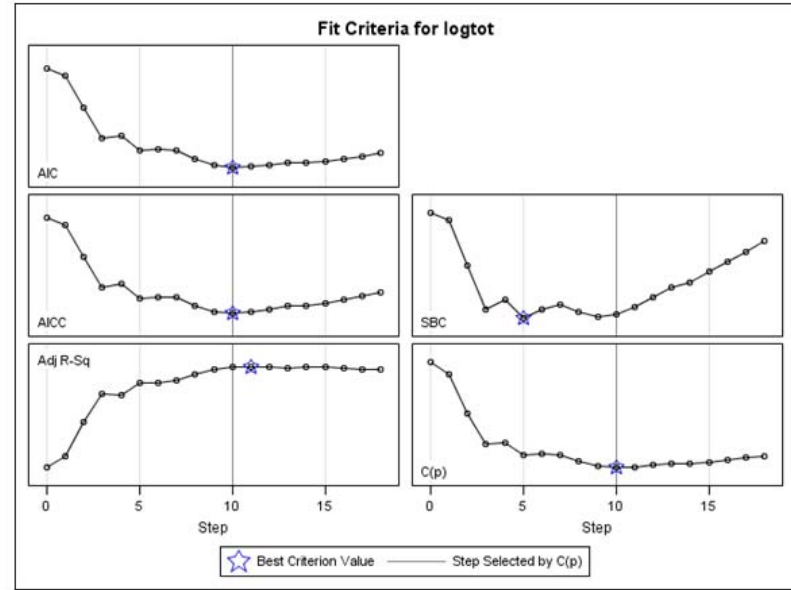

Fig s5

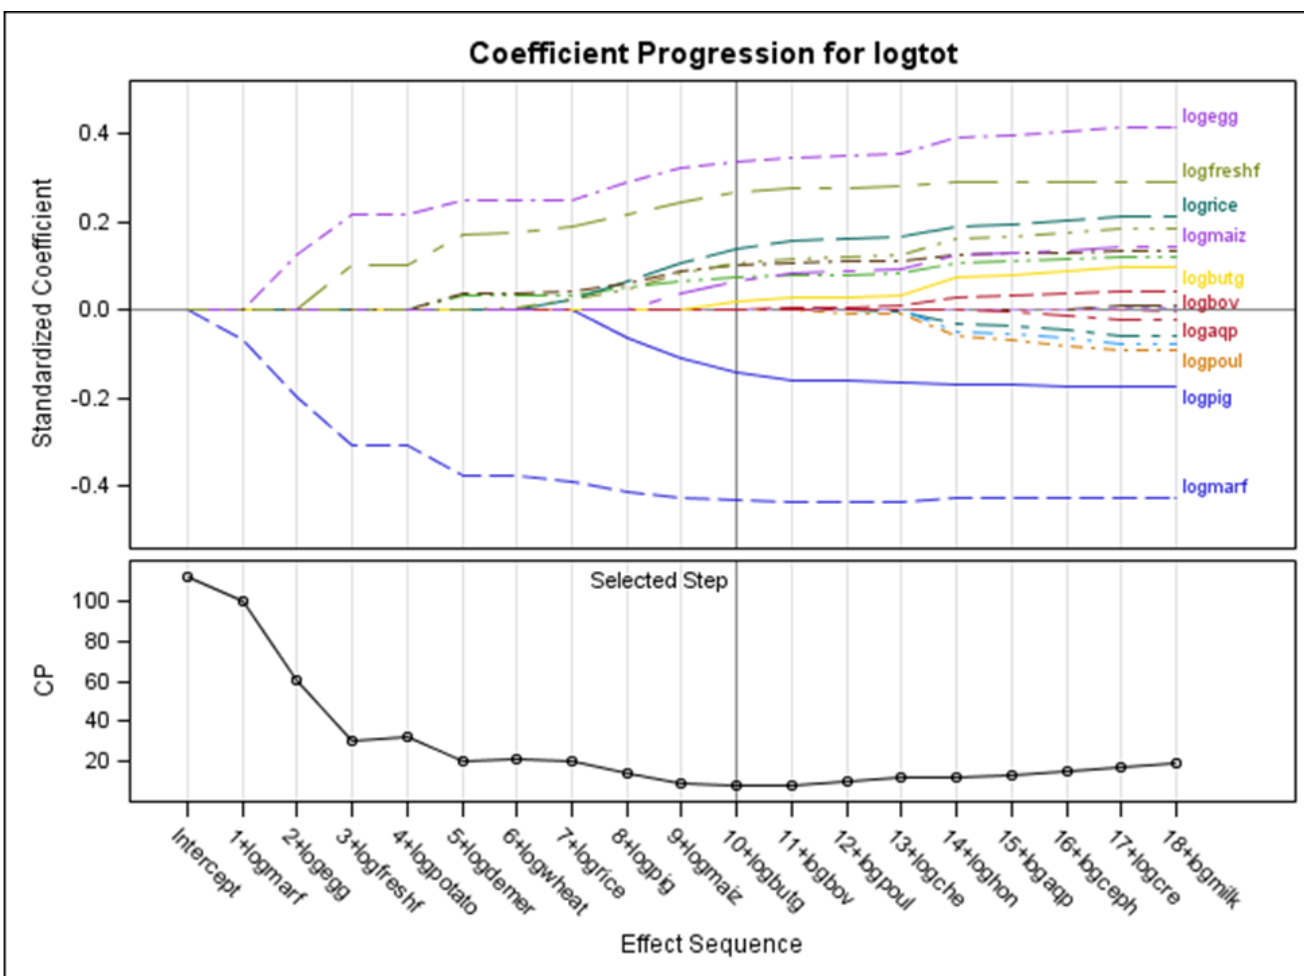

Fig s6

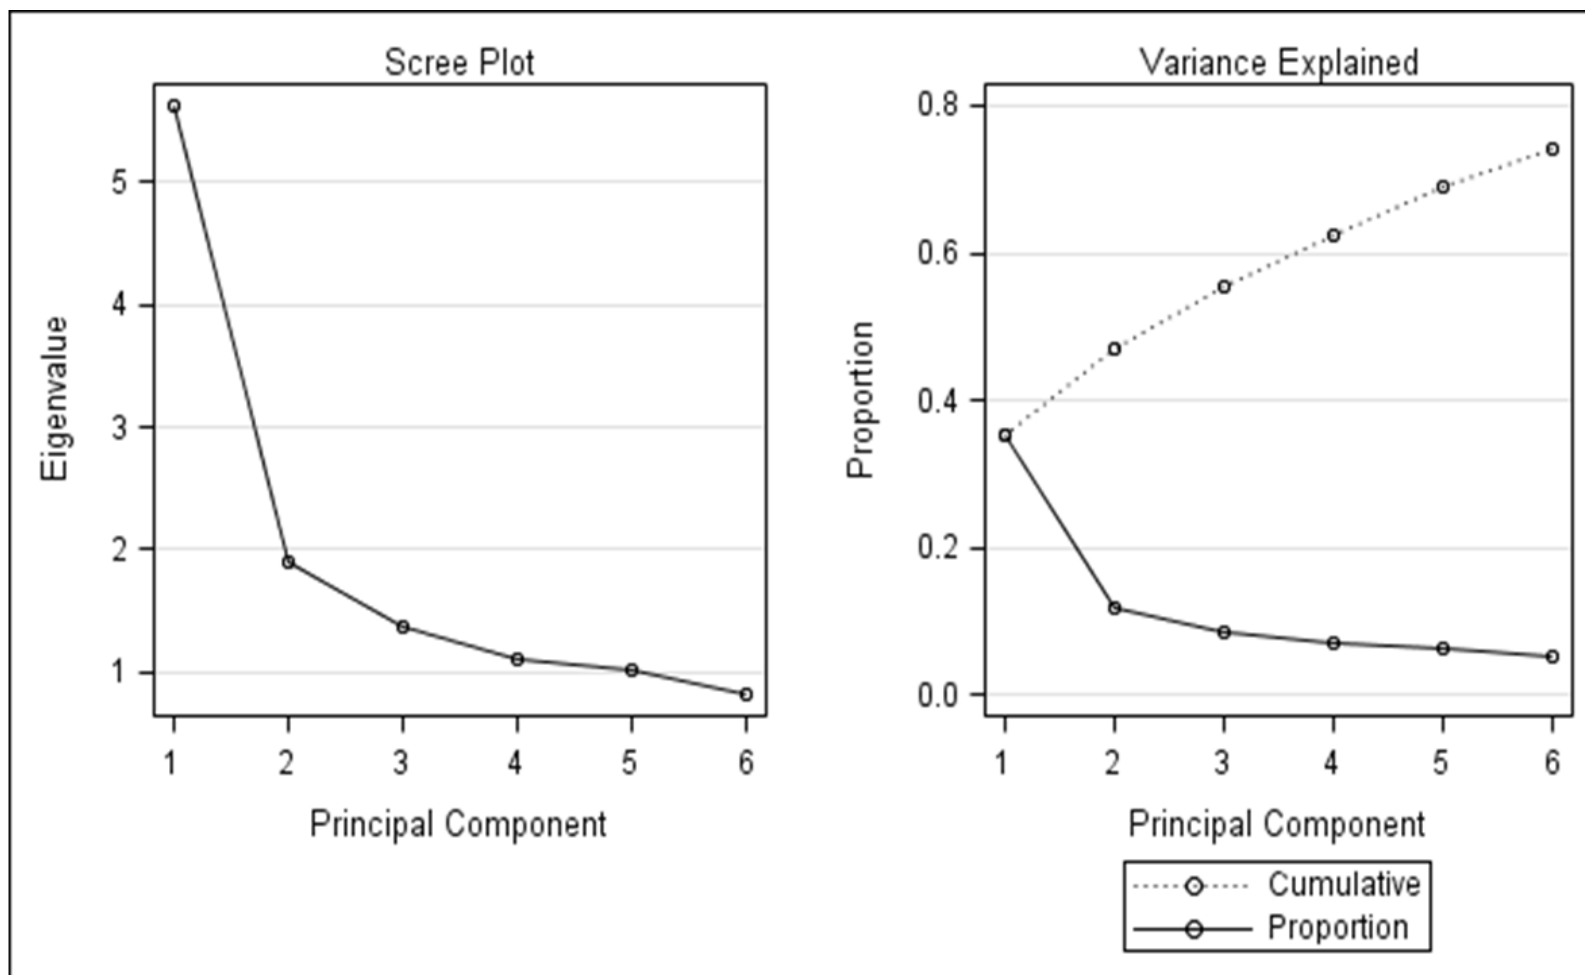

Fig s7

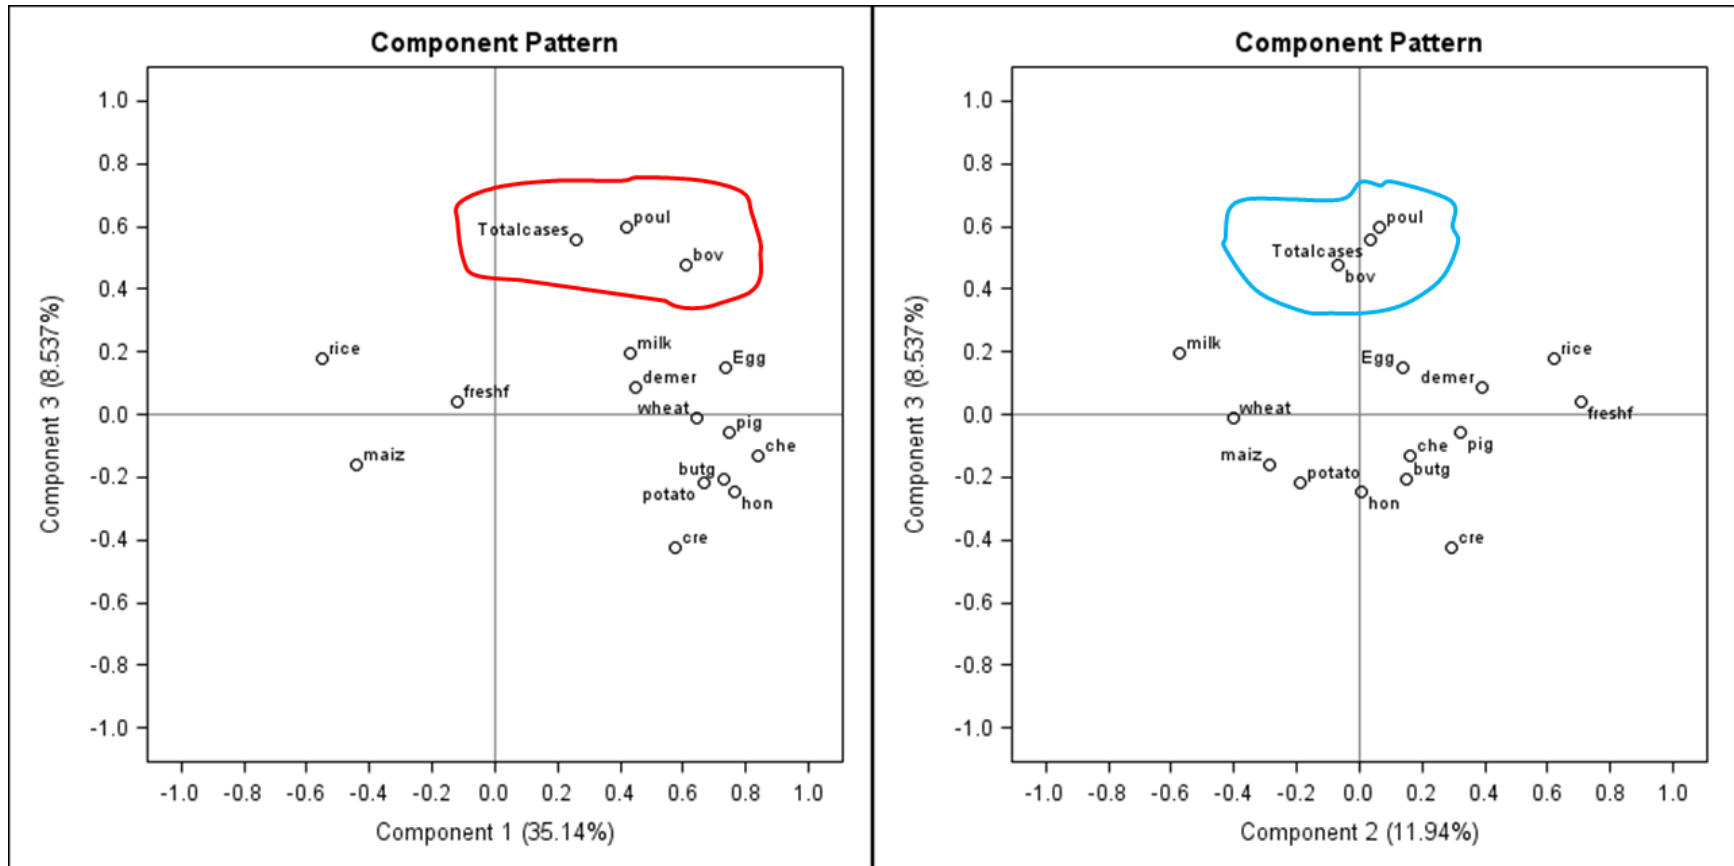

Fig s8

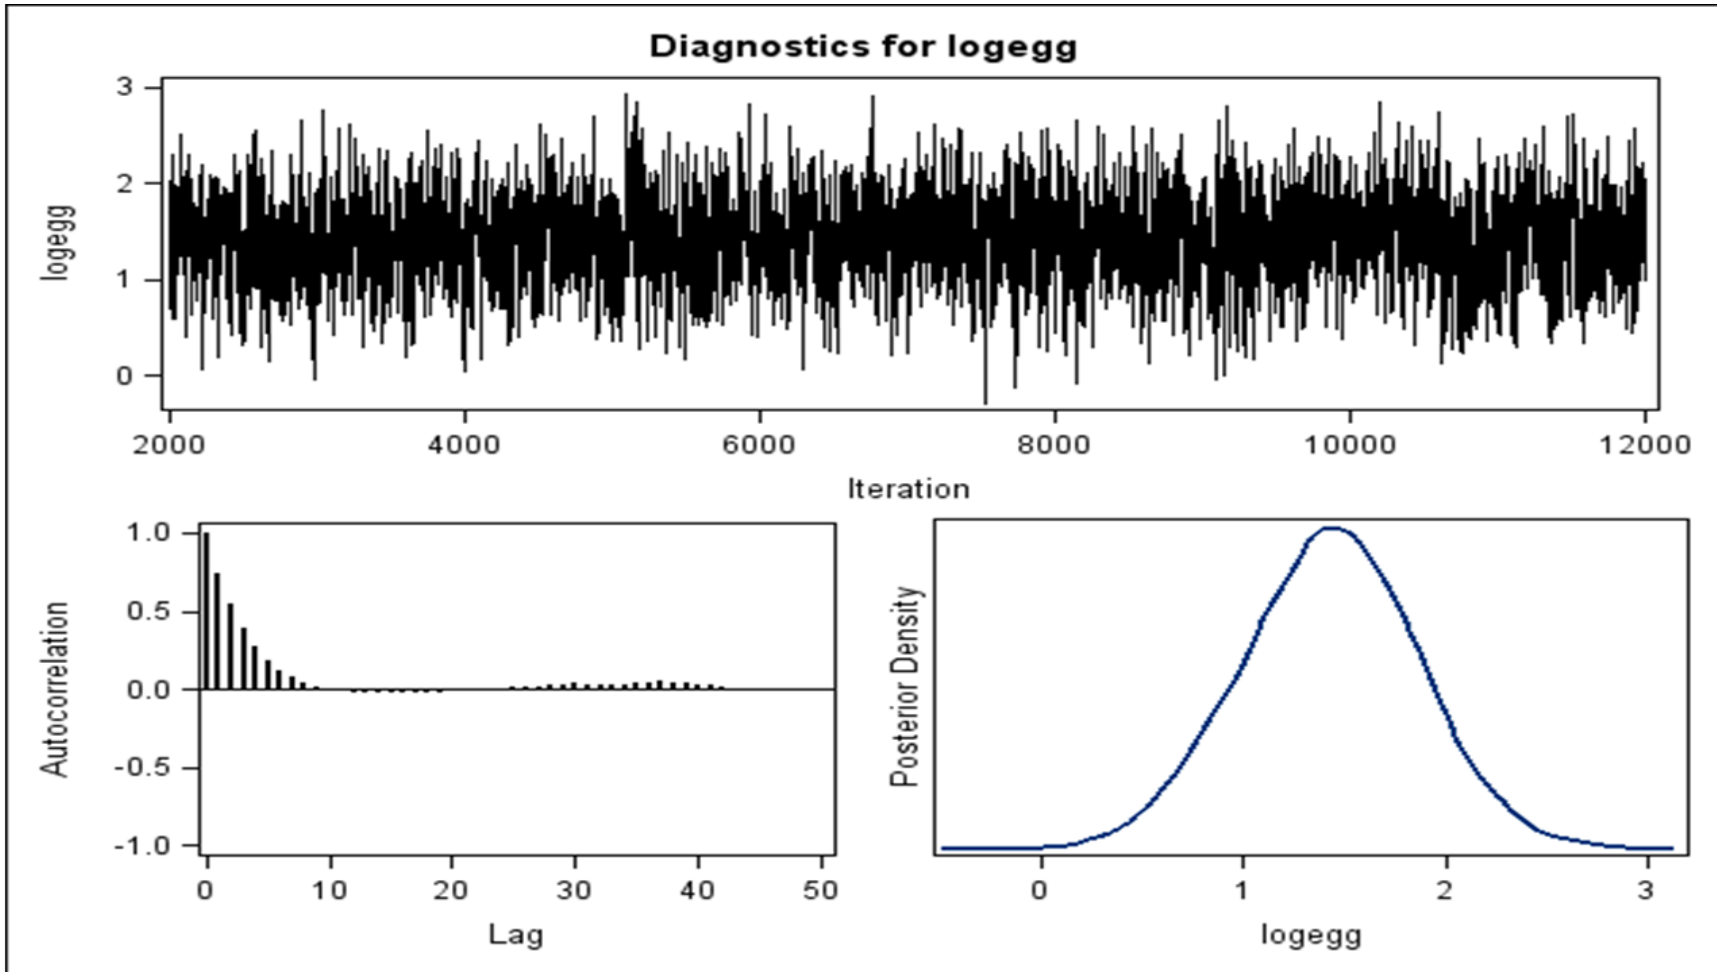

Source: https://www.medrxiv.org/content/10.1101/2020.06.16.20132464v2.full.pdf
